# Supplementary material
Source: publisher site journal article supplement (http://kjim.org/upload/media/kjim-2023-273-Supplementary-Table-1.pdf)
Supplement: Supplementary file 1 [file kjim-2023-273-Supplementary-Table-1.pdf]

**Supplementary Table 1. ICD-10 code for identification of comorbidity**

| Disease                                        | ICD-10 code                     |
|------------------------------------------------|---------------------------------|
| Diabetes mellitus                              | E10–E14                         |
| Myocardial infarction                          | I21, I22, I25                   |
| Congestive heart failure                       | I50                             |
| Peripheral vascular disease                    | I70–I79                         |
| Cerebrovascular disease                        | I60–I69                         |
| Dementia                                       | F03, G30                        |
| Chronic pulmonary disease                      | J41–J45, J47, J64               |
| Rheumatologic disease                          | M30–M36, M06                    |
| Peptic ulcer disease                           | K25, K26                        |
| Mild liver disease                             | B18, B19, K70–K77               |
| Hemiplegia or paraplegia                       | G80–G82                         |
| Moderate or severe renal disease               | N17–N19                         |
| Any malignancy including leukemia and lymphoma | C00–C41, C43, C45–C72, C74, C75 |
| Moderate to severe liver disease               | C81–C96                         |
| Metastasis solid tumor                         | C76–C80                         |
| AIDS                                           | B20–B24                         |

AIDS, acquired immune deficiency syndrome; ICD-10, International Classification of Disease-Tenth Revision.
